# Supplementary material
Source: PubMed Central journal article supplement (PMC2483787)
Supplement: NIHMS57570-supplement-1.pdf [file NIHMS57570-supplement-1.pdf]

## SUPPLEMENTARY MATERIAL

### Supplementary Methods

**Yeast plasmids.** The original tRNA/Bpa-tRNA synthetase plasmid pESC-BPZ was a gift from P. Schultz. For more efficient suppression, plasmid pESC-BPZ was modified to replace the promoter of the tRNA<sub>CUA</sub> gene by the 66 base *S. cerevisiae* tRNA promoter for the N(GTT)PR tRNA gene and this new plasmid is named pLH157. Plasmid pSH375 (*SUA7*, Cen, *LEU2*) was constructed by inserting the gene encoding *SUA7* (TFIIB) into pRS315<sup>1</sup> vector at PstI/SacI sites. This plasmid was used as the wild-type TFIIB plasmid (**Figure 1a**). The TFIIB-Ser53 amber plasmid, pLH163, was generated through Quickchange mutagenesis (Stratagene) creating a TAG mutation at Ser53. Plasmid pHC2201 (*RPB2*, Cen, *LEU2*) was constructed by subcloning a 5.5-kbp XbaI/SalI fragment containing *RPB2* from pRP212<sup>2</sup> into pRS315. To create plasmid pHC2501 (*RPB2*-Myc, 2 $\mu$ , *LEU2*), a 5.5-kbp NotI/SalI fragment from pHC2201 was first subcloned into pRS425<sup>3</sup>. Subsequently, the 414-bp of *S. cerevisiae* Adh1 promoter sequence was inserted in front of *RPB2* through PCR sewing and the 13-Myc epitope sequence was inserted at the C-terminus of *RPB2* using Quickchange mutagenesis (Stratagene) with a DNA fragment that was generated by PCR amplification of the 13-Myc epitope sequence in plasmid pFA6a-13Myc-kanMX6<sup>4</sup> with primer pairs carrying 5'- and 3'-sequences flanking *RPB2* C-terminus. Rpb2 amber plasmids containing single TAG codon at the mutation sites were generated by using oligonucleotide-directed phagemid mutagenesis of pHC2501. Rpb1 amber plasmids were generated through phagemid mutagenesis of pHC1601 (*RPB1*-Myc, 2 $\mu$ , *LEU2*) that contains Rpb1 gene sequence originally from pRP112<sup>5</sup>. Similar to the Rpb2 amber plasmid, Rpb1 is also driven by the Adh1 promoter and contains the 13-Myc epitope sequence at the C-terminus. Plasmid pHC2202 (*RPB2*-Flag, Cen, *LEU2*) was generated by inserting a triple Flag tag at the C-terminus of *RPB2* in pHC2201 (Rpb2, Cen, *LEU2*) by using oligonucleotide-directed phagemid mutagenesis. Radical mutations of the Rpb2 lobe and protrusion domains were subsequently introduced to pHC2202 through phagemid mutagenesis.

**Yeast Strains.** The following strains were used for TFIIB study: LHy165 (*MAT $\alpha$  ade1 $\Delta$  leu2 $\Delta$  his4 $\Delta$  ura3 $\Delta$  trp1::KanMX4 sua7::his4* [pSH375 and pLH157]); LHy167, isogenic to LHy165 except that plasmid pSH375 is replaced by pLH163 (TFIIB Ser53-amber). Each Rpb2 amber strain was generated from the shuffle strain HCy2501 through plasmid shuffling to contain both the Rpb2 amber plasmid and pLH157 plasmid. HCy2501 (*MAT $\alpha$  ade2::hisG his3 $\Delta$ 200 leu2 $\Delta$  lys2 $\Delta$  met15 $\Delta$  trp1 $\Delta$ 63 ura3 $\Delta$   $\Delta$ rpb2::kanMX4* [pRPB2-URA3]) was generated through transformation of a Rpb2-URA3 plasmid to the strain BY4705<sup>6</sup>, followed by one-step gene disruption of the chromosomal *RPB2* gene with a *rpb2::KanMX4* DNA fragment that was generated by PCR amplification of the drug resistant cassette pFA6-kanMX4<sup>7</sup> with primer pairs carrying *RPB2* 5'- and 3'-tails. Similarly, the Rpb1 amber strain containing both Rpb1 amber plasmid and pLH157 was generated from strain HCy1601 (*MAT $\alpha$  ade2::hisG his3 $\Delta$ 200 leu2 $\Delta$  lys2 $\Delta$  met15 $\Delta$  trp1 $\Delta$ 63 ura3 $\Delta$   $\Delta$ rpb1::KanMX4* [pRPB1-URA3]) through plasmid shuffling. The following are the strains containing triple Flag-tagged proteins: HCy1201 and HCy2201 contain a triple Flag epitope fused to the C-terminus of Rpb1 and Rpb2, respectively; HCy2202 containing Rpb2 triple Flag-tagged at the N-terminus; SHy384 and SHy564 containing a triple Flag epitope at the C-terminus of Tfg1 and Tfg2, respectively; SHy361 containing a triple Flag epitope at the C-terminus of Tfa1. The strain used for plasmid shuffling of Rpb2 lobe/protrusion mutant plasmids is HCy2501.

**Antisera.** Anti-Flag M2 monoclonal antibody was from Sigma, anti-Myc monoclonal antibody (9E10) and anti-Rpb1CTD monoclonal antibody (8WG16) were from Covance. Other antisera have been described previously<sup>8,9</sup>.

**TFIIF purification.** The 6xHis-SUMO-TFIIF expression plasmid from above was transformed into *E. coli* strain BL21 (DE3) RIL (Stratagene). The transformed cells were grown in 2 L YT medium containing ampicillin and chloramphenicol. Expression of SUMO-TFIIF fusion protein was induced by addition of IPTG to 0.1 mM when the O.D. of cell density was around 0.8. The cells were harvested by centrifugation 4 hours after induction and the cell paste was subsequently frozen in liquid nitrogen and stored at -70 °C. Cells were lysed by sonication in 25 ml lysis buffer of 250 mM KCl, 10% (v/v) glycerol, 20 mM imidazole, 5 mM  $\beta$ -mercaptoethanol (BME), 1 mM PMSF, 0.05% (v/v) NP-40, and 20 mM Tris (pH 7.8) and the lysate was clarified by

centrifugation. After centrifugation, the supernatant was incubated with 3 ml pre-equilibrated Nickel-Sepharose (GE Healthcare) at 4 °C. After 1.5-hour incubation, the supernatant was removed and the Nickel-Sepharose beads were washed twice with 25 ml wash buffer containing 1 M KCl, 10% (v/v) glycerol, 5 mM BME, 1 mM PMSF, 0.05% (v/v) NP-40 and 20 mM Tris (pH 7.8). The SUMO fusion protein was eluted with 24 ml elution buffer containing 250 mM imidazole, 250 mM KCl, 10% (v/v) glycerol, 5 mM BME, 1 mM PMSF, and 20 mM Tris (pH 7.8). The eluted protein sample was dialyzed against SUMO digestion buffer 150 mM KCl, 10% (v/v) glycerol, 1 mM PMSF, 1 mM DTT, 20 mM Tris pH 7.8. The resulting protein sample was subjected to SUMO protease digestion with 8 µg protease and 1 hr incubation at RT. The digested protein sample was loaded onto a 6 ml BioRex 70 (BioRad) column pre-equilibrated with the SUMO digestion buffer. The *SmTfg1/ScTfg2* heterodimer was eluted from the column with a salt gradient of 150 to 600 mM KCl. The fractions containing TFIIIF were pooled and concentrated with Centriprep YM-10 concentrator (Amicon) to ~0.8 mg ml<sup>-1</sup>. The typical yield of a TFIIIF variant is approximately from 0.5-1mg from 2-L induction. The protein solution was frozen with liquid nitrogen and stored at -70 °C.

## References

1. Sikorski, R.S. & Hieter, P. A system of shuttle vectors and yeast host strains designed for efficient manipulation of DNA in *Saccharomyces cerevisiae*. *Genetics* **122**, 19-27 (1989).
2. Scafe, C., Nonet, M. & Young, R.A. RNA polymerase II mutants defective in transcription of a subset of genes. *Mol Cell Biol* **10**, 1010-6 (1990).
3. Christianson, T.W., Sikorski, R.S., Dante, M., Shero, J.H. & Hieter, P. Multifunctional yeast high-copy-number shuttle vectors. *Gene* **110**, 119-22 (1992).
4. Longtine, M.S. et al. Additional modules for versatile and economical PCR-based gene deletion and modification in *Saccharomyces cerevisiae*. *Yeast* **14**, 953-61 (1998).
5. Nonet, M.L. & Young, R.A. Intragenic and extragenic suppressors of mutations in the heptapeptide repeat domain of *Saccharomyces cerevisiae* RNA polymerase II. *Genetics* **123**, 715-24 (1989).
6. Brachmann, C.B. et al. Designer deletion strains derived from *Saccharomyces cerevisiae* S288C: a useful set of strains and plasmids for PCR-mediated gene disruption and other applications. *Yeast* **14**, 115-32 (1998).
7. Wach, A., Brachat, A., Pohlmann, R. & Philippsen, P. New heterologous modules for classical or PCR-based gene disruptions in *Saccharomyces cerevisiae*. *Yeast* **10**, 1793-808 (1994).

8. Chen, H.T. & Hahn, S. Mapping the location of TFIIB within the RNA polymerase II transcription preinitiation complex: a model for the structure of the PIC. *Cell* **119**, 169-80 (2004).
9. Ranish, J.A., Yudkovsky, N. & Hahn, S. Intermediates in formation and activity of the RNA polymerase II preinitiation complex: holoenzyme recruitment and a postrecruitment role for the TATA box and TFIIB. *Genes Dev* **13**, 49-63 (1999).
